# Supplementary material for: Structural and energetic hot-spots for the interaction between a ladder-like polycyclic ether and the anti-ciguatoxin antibody 10C9Fab
Source: Royal Society of Chemistry journal article supplement (doi:10.1039/c0mb00162g), 2010-12-15
Supplement: c0mb00162g.pdf [file c0mb00162g.pdf]

## Supporting Information

Supplementary Figure 1

(a)

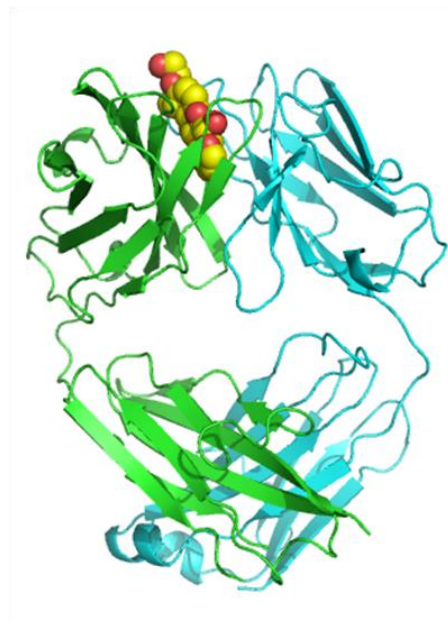

(b)

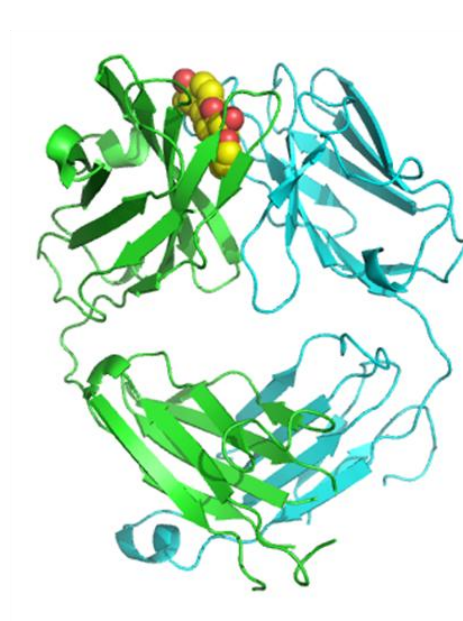

The crystal structures of 10C9Fab complexed with CTX3C-ABCDE (a) and with CTX3C-ABCD (b). Green: heavy chain of 10C9Fab; blue: light chain of 10C9Fab; yellow: carbon atoms in the antigens; red: oxygen atoms in the antigens.

Supplementary Figure 2

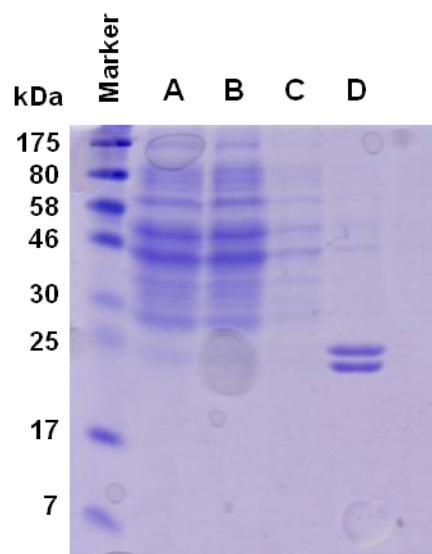

SDS-PAGE of mutant protein H-N58-A purified by protein G affinity chromatography. The lanes are as follows: unpurified lysate (A), unbound fraction (B), washing fraction (C), and elution fraction (D) of 200  $\mu$ L culture.

Supplementary Figure 3

(a)

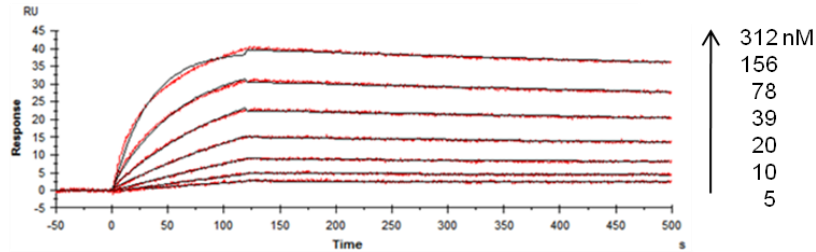

(b)

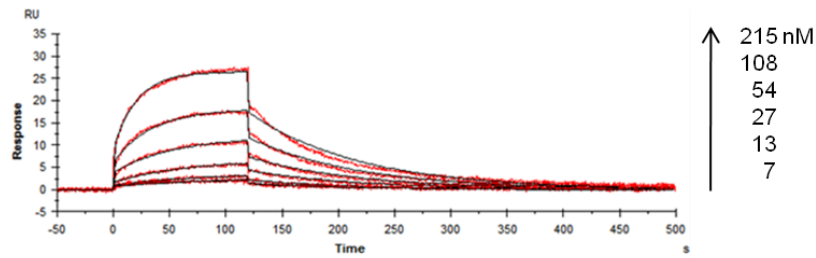

(c)

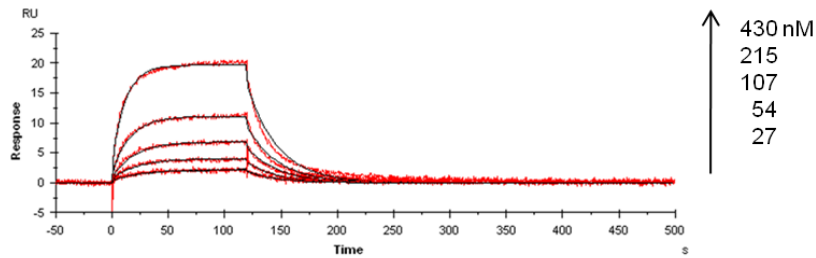

The surface plasmon resonance sensorgrams of wild-type 10C9Fab (a), H-H35a-A (b), and L-N94-A (c) upon interaction with CTX3C-ABCDE. Experimental data obtained at various analyte concentrations are shown as red lines, and the results of global fitting kinetic analyses are shown as black lines.
